# Supplementary material
Source: publisher figshare collection journal article supplement (https://acs.figshare.com/ndownloader/files/4515142)
Supplement: Supplementary file 1 [file 4515142]

## Supporting Information

Mechanism of photooxidation of alcohol over Nb<sub>2</sub>O<sub>5</sub>

Tetsuya Shishido<sup>a,\*</sup>, Toshiaki Miyatake<sup>a</sup>, Kentaro Teramura<sup>b</sup>, Yutaka Hitomi<sup>c</sup>, Hiromi Yamashita<sup>d</sup> and Tsunehiro Tanaka<sup>a,\*</sup>

### Affiliation and the address of the laboratory

<sup>a</sup> *Department of Molecular Engineering, Graduate School of Engineering, Kyoto University, Kyoto 615-8510, Japan.*

<sup>b</sup> *Kyoto University Pioneering Research Univt for Next Generation, Kyoto University, Katsura, Kyoto 615-8510, Japan.*

<sup>c</sup> *Department of Molecular Chemistry and Biochemistry, Doshishya University, Kyotanabe, Kyoto 610-0321, Japan.*

<sup>d</sup> *Division of Materials and Manufacturing Science, Graduate School of Engineering, Osaka University, Osaka 565-0871, Japan.*

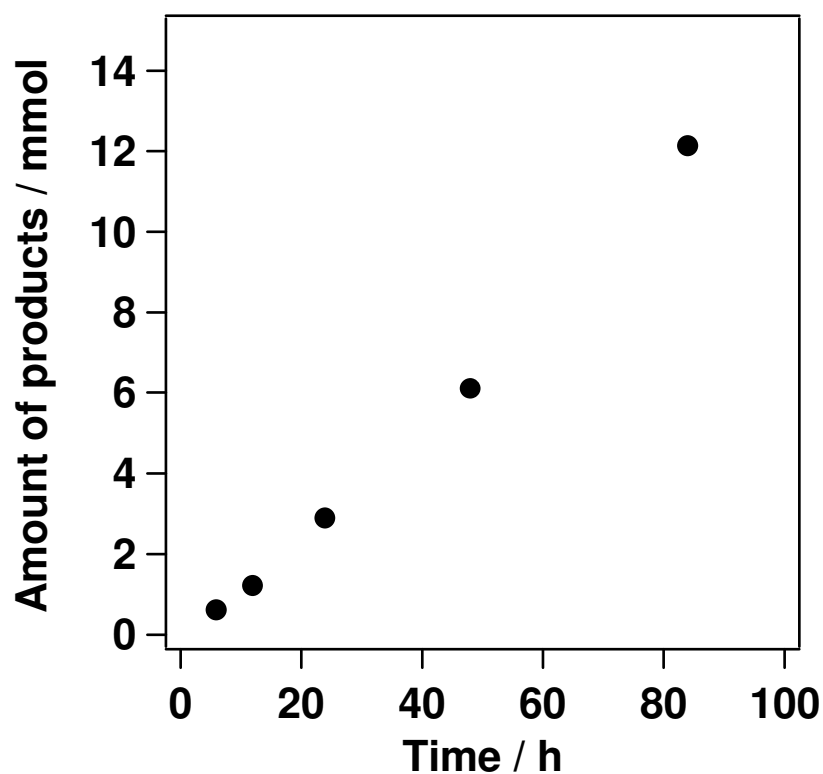

Figure S1. Time course of the photooxidation of 1-pentanol over the Nb<sub>2</sub>O<sub>5</sub> catalyst

Amount of products = 1-pentanol + pentanoic acid

Reaction conditions were as follows: alcohol (10 mL), Nb<sub>2</sub>O<sub>5</sub> (100 mg), 323 K, under 1 atm of O<sub>2</sub>, O<sub>2</sub> flow rate (2 cm<sup>3</sup> min<sup>-1</sup>): conversion and selectivity were determined by gas chromatography with an internal standard.
